# Supplementary material
Source: MDPI journal article supplement (https://www.mdpi.com/2039-4403/13/4/125)
Supplement: s1 [file s1]

**SUPPLEMENTARY FILE S1.** Search strategy for the eight electronic databases.

| <b>PUBMED. Date of Search: 13/02/2023. Number of results: 204</b>                  |                                                                                                                                                                                                                                                                                                                                                                                                                                                                                                                                                                                                                                                                                                                                                                                                                                                                                             |           |
|------------------------------------------------------------------------------------|---------------------------------------------------------------------------------------------------------------------------------------------------------------------------------------------------------------------------------------------------------------------------------------------------------------------------------------------------------------------------------------------------------------------------------------------------------------------------------------------------------------------------------------------------------------------------------------------------------------------------------------------------------------------------------------------------------------------------------------------------------------------------------------------------------------------------------------------------------------------------------------------|-----------|
| #                                                                                  | Search string                                                                                                                                                                                                                                                                                                                                                                                                                                                                                                                                                                                                                                                                                                                                                                                                                                                                               | Results   |
| 1                                                                                  | "Suicide"[Mesh] OR "Suicide, Completed"[Mesh] OR "Suicidal Ideation"[Mesh] OR "Suicide, Attempted"[Mesh] OR Suicid*[tiab] OR Parasuicid*[tiab] OR "suicidal behavior"[tiab] OR "suicidal behaviour"[tiab] OR "completed suicide"[tiab] OR "Suicidal Ideation"[tiab] OR "attempted suicide"[tiab]                                                                                                                                                                                                                                                                                                                                                                                                                                                                                                                                                                                            | 111,311   |
| 2                                                                                  | "Communication Media"[tiab] OR news[tiab] OR newspaper*[tiab] OR "newspaper article"[tiab] OR periodical*[tiab] OR "Newspaper Article"[Publication Type] OR "News"[Publication Type] OR "Video-Audio Media"[Publication Type] OR Audiovisual Media[tiab] OR Audio-Visual Media[tiab] OR "videotape recording"[tiab] OR "Audiovisual Aids"[Mesh] OR "audiovisual aid"[tiab] OR "Radio"[Mesh] OR "Television"[Mesh] OR television*[tiab] OR "Telecommunications"[Mesh] OR telecommunication*[tiab] OR campaign*[tiab] OR advert*[tiab] OR "mass medium"[tiab] OR "audiovisual equipment"[tiab]                                                                                                                                                                                                                                                                                                | 642,103   |
| 3                                                                                  | meta-analysis OR "meta analy*" OR metanaly* OR metaanaly* OR ((systematic* OR evidence*) AND (review* OR overview*)) OR "meta analysis" OR (("multiple treatment*" OR "indirect" OR "mixed") AND "comparison*") OR "systematic review" OR "reference list*" OR bibliograph* OR "hand search*" OR "manual search*" OR "relevant journals" OR "search strategy" OR "search criteria" OR "systematic search" OR "study selection" OR "data extraction" OR (search* AND literature) OR (("multiple treatment*" OR indirect OR mixed) AND comparison*) OR medline OR pubmed OR cochrane OR embase OR psychlit OR psyclit OR psychinfo OR psycinfo OR cinahl OR "science citation index" OR "Cochrane Database Syst Rev"[jour] OR "meta analysis as topic"[MeSH Terms] OR "systematic reviews as topic"[MeSH Terms] OR "meta analysis"[Publication Type] OR "systematic review"[Publication Type] | 1,239,647 |
| 4                                                                                  | #1 AND #2 AND #3                                                                                                                                                                                                                                                                                                                                                                                                                                                                                                                                                                                                                                                                                                                                                                                                                                                                            | 204       |
| <b>CINAHL &amp; PsycInfo. Date of Search: 13/02/2023. Number of results: 2.981</b> |                                                                                                                                                                                                                                                                                                                                                                                                                                                                                                                                                                                                                                                                                                                                                                                                                                                                                             |           |
| #                                                                                  | Search string                                                                                                                                                                                                                                                                                                                                                                                                                                                                                                                                                                                                                                                                                                                                                                                                                                                                               | Results   |
| 1                                                                                  | (MH "Suicide+") OR (MH "Suicide, Attempted") OR (MH "Suicidal Ideation") OR Suicid* OR Parasuicid* OR "suicidal behavior*" OR "suicidal behaviour*" OR "completed suicide" OR "Suicidal Ideation" OR "attempted suicide"                                                                                                                                                                                                                                                                                                                                                                                                                                                                                                                                                                                                                                                                    | 130,694   |
| 2                                                                                  | "Communication Media" OR news OR newspaper* OR "newspaper article*" OR periodical* OR Audiovisual Media OR Audio-Visual Media OR "videotape recording*" OR "audiovisual aid*" OR television* OR telecommunication* OR campaign* OR advert* OR "mass medium*" OR "audiovisual equipment*" OR (MH "Communications Media+") OR (MH "News+") OR (MH "Television") OR (MH "Audiorecording") OR (MH "Radio") OR (MH "Videorecording+")                                                                                                                                                                                                                                                                                                                                                                                                                                                            | 932,051   |
| 3                                                                                  | (MH "Cochrane Library") OR (MH "Literature Review+") OR meta-analysis OR "meta analy*" OR metanaly* OR metaanaly* OR ((systematic* OR evidence*) AND (review* OR overview*)) OR "meta analysis" OR (("multiple treatment*" OR "indirect" OR "mixed") AND "comparison*") OR "systematic review" OR "reference list*" OR bibliograph* OR "hand search*" OR "manual search*" OR "relevant journals" OR "search strategy" OR "search criteria" OR "systematic search" OR "study selection" OR "data extraction" OR (search* AND literature) OR (("multiple treatment*" OR indirect OR mixed) AND comparison*) OR medline OR pubmed OR cochrane OR embase OR psychlit OR psyclit OR psychinfo OR psycinfo OR cinahl OR "science citation index"                                                                                                                                                  | 5,495,906 |
| 4                                                                                  | S1 AND S2 AND S3                                                                                                                                                                                                                                                                                                                                                                                                                                                                                                                                                                                                                                                                                                                                                                                                                                                                            | 2,981     |
| <b>WEB OF SCIENCE. Date of Search: 13/02/2023. Number of results: 212</b>          |                                                                                                                                                                                                                                                                                                                                                                                                                                                                                                                                                                                                                                                                                                                                                                                                                                                                                             |           |
| #                                                                                  | Search string                                                                                                                                                                                                                                                                                                                                                                                                                                                                                                                                                                                                                                                                                                                                                                                                                                                                               | Results   |
| 1                                                                                  | ALL=(meta-analysis OR "meta analy*" OR metanaly* OR metaanaly* OR ((systematic* OR evidence*) AND (review* OR overview*)) OR "meta analysis" OR (("multiple treatment*" OR "indirect" OR "mixed") AND "comparison*") OR "systematic review" OR "reference list*" OR bibliograph* OR "hand search*" OR "manual search*" OR "relevant journals" OR "search strategy" OR "search criteria" OR "systematic search" OR "study selection" OR "data extraction" OR (search* AND literature) OR (("multiple treatment*" OR indirect OR mixed) AND comparison*) OR medline OR pubmed OR cochrane OR embase OR psychlit OR psyclit OR psychinfo OR psycinfo OR cinahl OR "science citation index")                                                                                                                                                                                                    | 1,750,831 |
| 2                                                                                  | ALL=("Communication Media" OR news OR newspaper* or "newspaper article*" OR periodical* OR Audiovisual Media OR Audio-Visual Media OR "videotape recording*" OR "audiovisual aid*" OR television* OR telecommunication* OR campaign* OR advert* OR "mass medium*" OR "audiovisual equipment*")                                                                                                                                                                                                                                                                                                                                                                                                                                                                                                                                                                                              | 1,583,167 |
| 3                                                                                  | ALL=(Suicid* OR Parasuicid* OR "suicidal behavior*" OR "suicidal behaviour*" OR "completed suicide" OR "Suicidal Ideation" OR "attempted suicide")                                                                                                                                                                                                                                                                                                                                                                                                                                                                                                                                                                                                                                                                                                                                          | 119,517   |
| 4                                                                                  | #3 AND #2 AND #1                                                                                                                                                                                                                                                                                                                                                                                                                                                                                                                                                                                                                                                                                                                                                                                                                                                                            | 212       |

| <b>EMBASE. Date of Search: 13/02/2023. Number of results: 936</b>   |                                                                                                                                                                                                                                                                                                                                                                                                                                                                                                                                                                                                                                                                                                                                                                                                                                                                                                                      |           |
|---------------------------------------------------------------------|----------------------------------------------------------------------------------------------------------------------------------------------------------------------------------------------------------------------------------------------------------------------------------------------------------------------------------------------------------------------------------------------------------------------------------------------------------------------------------------------------------------------------------------------------------------------------------------------------------------------------------------------------------------------------------------------------------------------------------------------------------------------------------------------------------------------------------------------------------------------------------------------------------------------|-----------|
| #                                                                   | Search string                                                                                                                                                                                                                                                                                                                                                                                                                                                                                                                                                                                                                                                                                                                                                                                                                                                                                                        | Results   |
| 1                                                                   | 'suicide attempt'/exp OR 'suicide attempt'                                                                                                                                                                                                                                                                                                                                                                                                                                                                                                                                                                                                                                                                                                                                                                                                                                                                           | 39,904    |
| 2                                                                   | 'suicidal behavior'/exp OR 'suicidal behavior'                                                                                                                                                                                                                                                                                                                                                                                                                                                                                                                                                                                                                                                                                                                                                                                                                                                                       | 127,463   |
| 3                                                                   | 'suicide'/exp OR suicide                                                                                                                                                                                                                                                                                                                                                                                                                                                                                                                                                                                                                                                                                                                                                                                                                                                                                             | 133,452   |
| 4                                                                   | 'suicidal ideation'/exp OR 'suicidal ideation'                                                                                                                                                                                                                                                                                                                                                                                                                                                                                                                                                                                                                                                                                                                                                                                                                                                                       | 33,561    |
| 5                                                                   | suicid* OR parasuicid* OR 'suicidal behavior*' OR 'suicidal behaviour*' OR 'completed suicide'/exp OR 'completed suicide' OR 'suicidal ideation'/exp OR 'suicidal ideation' OR 'attempted suicide'/exp OR 'attempted suicide'                                                                                                                                                                                                                                                                                                                                                                                                                                                                                                                                                                                                                                                                                        | 162,909   |
| 6                                                                   | #1 OR #2 OR #3 OR #4 OR #5                                                                                                                                                                                                                                                                                                                                                                                                                                                                                                                                                                                                                                                                                                                                                                                                                                                                                           | 163,894   |
| 7                                                                   | 'publication'/exp OR publication                                                                                                                                                                                                                                                                                                                                                                                                                                                                                                                                                                                                                                                                                                                                                                                                                                                                                     | 461,239   |
| 8                                                                   | 'audiovisual equipment'/exp OR 'audiovisual equipment'                                                                                                                                                                                                                                                                                                                                                                                                                                                                                                                                                                                                                                                                                                                                                                                                                                                               | 122,456   |
| 9                                                                   | 'mass medium'/exp OR 'mass medium'                                                                                                                                                                                                                                                                                                                                                                                                                                                                                                                                                                                                                                                                                                                                                                                                                                                                                   | 20,467    |
| 10                                                                  | 'communication media' OR 'news'/exp OR news OR newspaper* OR 'newspaper article*' OR periodical* OR 'audiovisual media'/exp OR 'audiovisual media' OR (audiovisual AND ('media'/exp OR media)) OR 'audio-visual media' OR ('audio visual' AND ('media'/exp OR media)) OR 'videotape recording*' OR 'audiovisual aid*' OR television* OR telecommunication* OR campaign* OR advert* OR 'mass medium*' OR 'audiovisual equipment*'                                                                                                                                                                                                                                                                                                                                                                                                                                                                                     | 692,341   |
| 11                                                                  | #7 OR #8 OR #9 OR #10                                                                                                                                                                                                                                                                                                                                                                                                                                                                                                                                                                                                                                                                                                                                                                                                                                                                                                | 1,133,877 |
| 12                                                                  | 'systematic review (topic)'/exp OR 'systematic review (topic)' OR 'systematic review'/exp OR 'systematic review'                                                                                                                                                                                                                                                                                                                                                                                                                                                                                                                                                                                                                                                                                                                                                                                                     | 493,538   |
| 13                                                                  | 'meta analy*':ab,ti OR metanaly*':ab,ti OR metaanaly*':ab,ti OR ((systematic*':ab,ti OR evidence*':ab,ti) AND (review*':ab,ti OR overview*':ab,ti)) OR 'meta analysis':ab,ti OR (('multiple treatment*':ab,ti OR 'indirect':ab,ti OR 'mixed':ab,ti) AND 'comparison*':ab,ti) OR 'systematic review':ab,ti OR 'reference list*':ab,ti OR bibliograph*':ab,ti OR 'hand search*':ab,ti OR 'manual search*':ab,ti OR 'relevant journals':ab,ti OR 'search strategy':ab,ti OR 'search criteria':ab,ti OR 'systematic search':ab,ti OR 'study selection':ab,ti OR 'data extraction':ab,ti OR (search*':ab,ti AND literature:ab,ti) OR (('multiple treatment*':ab,ti OR indirect:ab,ti OR mixed:ab,ti) AND comparison*':ab,ti) OR medline:ab,ti OR pubmed:ab,ti OR cochrane:ab,ti OR embase:ab,ti OR psychlit:ab,ti OR psyclit:ab,ti OR psychinfo:ab,ti OR psycinfo:ab,ti OR cinahl:ab,ti OR 'science citation index':ab,ti | 1,252,721 |
| 14                                                                  | #12 OR #13                                                                                                                                                                                                                                                                                                                                                                                                                                                                                                                                                                                                                                                                                                                                                                                                                                                                                                           | 1,314,708 |
| 15                                                                  | #6 AND #11 AND #14                                                                                                                                                                                                                                                                                                                                                                                                                                                                                                                                                                                                                                                                                                                                                                                                                                                                                                   | 936       |
| <b>COCHRANE. Date of Search: 13/02/2023. Number of results: 115</b> |                                                                                                                                                                                                                                                                                                                                                                                                                                                                                                                                                                                                                                                                                                                                                                                                                                                                                                                      |           |
| #                                                                   | Search string                                                                                                                                                                                                                                                                                                                                                                                                                                                                                                                                                                                                                                                                                                                                                                                                                                                                                                        | Results   |
| 1                                                                   | MeSH descriptor: [Systematic Reviews as Topic] explode all trees                                                                                                                                                                                                                                                                                                                                                                                                                                                                                                                                                                                                                                                                                                                                                                                                                                                     | 54        |
| 2                                                                   | MeSH descriptor: [Mass Media] explode all trees                                                                                                                                                                                                                                                                                                                                                                                                                                                                                                                                                                                                                                                                                                                                                                                                                                                                      | 2,100     |
| 3                                                                   | MeSH descriptor: [Suicide] explode all trees                                                                                                                                                                                                                                                                                                                                                                                                                                                                                                                                                                                                                                                                                                                                                                                                                                                                         | 1,803     |
| 4                                                                   | MeSH descriptor: [Suicide, Attempted] explode all trees                                                                                                                                                                                                                                                                                                                                                                                                                                                                                                                                                                                                                                                                                                                                                                                                                                                              | 577       |
| 5                                                                   | meta-analysis OR "meta analy*" OR metanaly* OR metaanaly* OR ((systematic* OR evidence*) AND (review* OR overview*)) OR "meta analysis" OR (("multiple treatment*" OR "indirect" OR "mixed") AND "comparison*") OR "systematic review" OR "reference list*" OR bibliograph* OR "hand search*" OR "manual search*" OR "relevant journals" OR "search strategy" OR "search criteria" OR "systematic search" OR "study selection" OR "data extraction" OR (search* AND literature) OR (((multiple treatment*" OR indirect OR mixed) AND comparison*) OR medline OR pubmed OR cochrane OR embase OR psychlit OR psyclit OR psychinfo OR psycinfo OR cinahl OR "science citation index"                                                                                                                                                                                                                                   | 1.985.432 |
| 6                                                                   | "Communication Media" OR news OR newspaper* OR "newspaper article*" OR periodical* OR Audiovisual Media OR Audio-Visual Media OR "videotape recording*" OR "audiovisual aid*" OR television* OR telecommunication* OR campaign* OR advert* OR "mass medium*" OR "audiovisual equipment*"                                                                                                                                                                                                                                                                                                                                                                                                                                                                                                                                                                                                                             | 17.857    |
| 7                                                                   | Suicid* OR Parasuicid* OR "suicidal behavior*" OR "suicidal behaviour*" OR "completed suicide" OR "Suicidal Ideation" OR "attempted suicide"                                                                                                                                                                                                                                                                                                                                                                                                                                                                                                                                                                                                                                                                                                                                                                         | 8.388     |
| 8                                                                   | #7 OR #4 OR #3                                                                                                                                                                                                                                                                                                                                                                                                                                                                                                                                                                                                                                                                                                                                                                                                                                                                                                       | 8,388     |
| 9                                                                   | #5 OR #1                                                                                                                                                                                                                                                                                                                                                                                                                                                                                                                                                                                                                                                                                                                                                                                                                                                                                                             | 1.985.432 |
| 10                                                                  | #6 OR #2                                                                                                                                                                                                                                                                                                                                                                                                                                                                                                                                                                                                                                                                                                                                                                                                                                                                                                             | 18.316    |
| 11                                                                  | #9 AND #10 AND #8                                                                                                                                                                                                                                                                                                                                                                                                                                                                                                                                                                                                                                                                                                                                                                                                                                                                                                    | 115       |

| <b>SCOPUS. Date of Search: 13/02/2023. Number of results: 50</b>         |                                                                                                                                                                                                                                                                                                                                                                                                                                                                                                                                                                                                                                                                                                                   |           |
|--------------------------------------------------------------------------|-------------------------------------------------------------------------------------------------------------------------------------------------------------------------------------------------------------------------------------------------------------------------------------------------------------------------------------------------------------------------------------------------------------------------------------------------------------------------------------------------------------------------------------------------------------------------------------------------------------------------------------------------------------------------------------------------------------------|-----------|
| #                                                                        | Search string                                                                                                                                                                                                                                                                                                                                                                                                                                                                                                                                                                                                                                                                                                     | Results   |
| 1                                                                        | TITLE-ABS-KEY ( meta-analysis OR "meta analy*" OR metanaly* OR metaanaly* OR ( ( systematic* OR evidence* ) AND ( review* OR overview* ) ) OR "meta analysis" OR ( ( "multiple treatment*" OR "indirect" OR "mixed" ) AND "comparison*" ) OR "systematic review" OR "reference list*" OR bibliograph* OR "hand search*" OR "manual search*" OR "relevant journals" OR "search strategy" OR "search criteria" OR "systematic search" OR "study selection" OR "data extraction" OR ( search* AND literature ) OR ( ( "multiple treatment*" OR indirect OR mixed ) AND comparison* ) OR medline OR pubmed OR cochrane OR embrace OR psychic OR psychiat OR psychic OR psycho OR cineol OR "science citation index" ) | 1.889.135 |
| 2                                                                        | TITLE-ABS-KEY ( "Communication Media" OR news OR newspaper* OR "newspaper article*" OR periodical* OR audiovisual AND media OR audio-visual AND media OR "videotape recording*" OR "audiovisual aid*" OR television* OR telecommunication* OR campaign* OR advert* OR "mass medium*" OR "audiovisual equipment*" )                                                                                                                                                                                                                                                                                                                                                                                                | 88.227    |
| 3                                                                        | TITLE-ABS-KEY ( suicid* OR parasuicid* OR "suicidal behavior*" OR "suicidal behaviour*" OR "completed suicide" OR "Suicidal Ideation" OR "attempted suicide" )                                                                                                                                                                                                                                                                                                                                                                                                                                                                                                                                                    | 172.632   |
| 4                                                                        | S1 AND S2 AND S3                                                                                                                                                                                                                                                                                                                                                                                                                                                                                                                                                                                                                                                                                                  | 50        |
| <b>GOOGLE SCHOLAR. Date of Search: 13/02/2023. Number of results: 22</b> |                                                                                                                                                                                                                                                                                                                                                                                                                                                                                                                                                                                                                                                                                                                   |           |
| 1                                                                        | "systematic review" "Communication Media" "suicidal behavior" "Suicidal Ideation" "attempted suicide"                                                                                                                                                                                                                                                                                                                                                                                                                                                                                                                                                                                                             | 22        |

**SUPPLEMENTARY FILE S2.** Studies that might appear to meet the inclusion criteria.

| <b>Reference<br/>and year</b> | <b>Main reason<br/>for exclusion</b> |
|-------------------------------|--------------------------------------|
| Szumilas et Kutcher,<br>2009  | No systematic review                 |
| Mee-Huong et al.,<br>2014     | Out of scope                         |
| Hernández et al.,<br>2015     | Out of scope                         |
| Larsen et al.,<br>2016        | Out of scope                         |
| Quigley et al.,<br>2016       | Out of scope                         |
| Hoffman et al.,<br>2017       | No systematic review                 |
| McClatchey et al.,<br>2017    | Out of scope                         |
| Franco-Martin et al.,<br>2018 | Out of scope                         |
| McClatchey et al.,<br>2018    | Out of scope                         |
| Mishara et Dargis,<br>2019    | No systematic review                 |
| Saquete et al.,<br>2019       | Out of scope                         |
| Bada et Clayton,<br>2020      | No systematic review                 |
| Biernsesser et al.,<br>2020   | No systematic review                 |
| Evans et Abrahamson,<br>2020  | Out of scope                         |
| Sanchez et al.,<br>2020       | Out of scope                         |
| April et al.,<br>2021         | Out of scope                         |
| Dabkowski et Porter.,<br>2021 | Out of scope                         |
| Sonke et al.,<br>2021         | Out of scope                         |
| Brennan et al.,<br>2022       | Out of scope                         |
